# Supplementary material for: Aromatic long chain cations of amphiphilic ionic liquids permeabilise the inner mitochondrial membrane and induce mitochondrial dysfunction at cytotoxic concentrations
Source: Royal Society of Chemistry journal article supplement (doi:10.1039/d3gc00151b), 2023-01-01
Supplement: d3gc00151b1.pdf [file d3gc00151b1.pdf]

**Supporting information:**

**Aromatic long chain cations of ionic liquids permeabilise the inner  
mitochondrial membrane and induce mitochondrial dysfunction at  
cytotoxic concentrations**

Meryem-Nur Duman<sup>1</sup>, Alexander Angeloski<sup>1,2</sup>, Michael S. Johnson<sup>3,4</sup>, Tristan Rawling<sup>1\*</sup>

<sup>1</sup>School of Mathematical and Physical Sciences, Faculty of Science, University of  
Technology Sydney, Sydney, NSW, 2007, Australia;

<sup>2</sup>National deuteration facility, Australia Nuclear Science and Technology Organisation, Lucas  
Heights, Sydney, NSW, 2232, Australia;

<sup>3</sup>School of Life Sciences, Faculty of Science, University of Technology Sydney, Sydney,  
NSW, 2007, Australia;

<sup>4</sup>School of Biomedical Sciences, Faculty of Medicine, University of New South Wales,  
Sydney, NSW, 2052, Australia;

## **Table of Content**

1. Supporting tables
2. Supporting figures
3. Experimental procedures - Chemistry
4. Experimental procedures – Biology
5. Experimental procedures – Tethered bilayer lipid membranes
6. References

## 1. Supporting Tables

**Table S1** Viability of HeLa cells relative to DMSO-treated control cells after treatment with AmILs at their MTS IC<sub>50</sub> concentrations for 4 hours, as measured by the MTS assay.

| Compound                   | HeLa IC <sub>50</sub> (mM) | Cell viability (% of control) |
|----------------------------|----------------------------|-------------------------------|
| [C <sub>4</sub> quin][Br]  | 2.24 ± 0.06                | 93 ± 2.7                      |
| [C <sub>4</sub> py][Br]    | 13.31 ± 1.18               | 99 ± 1.6                      |
| [C <sub>4</sub> mim][Br]   | 13.88 ± 1.84               | 96 ± 2.8                      |
| [C <sub>4</sub> TMA][Br]   | 11.43 ± 1.23               | 96 ± 2.8                      |
| [C <sub>10</sub> quin][Br] | 0.0268 ± 0.0003            | 93 ± 0.98                     |
| [C <sub>10</sub> py][Br]   | 0.0888 ± 0.0003            | 97 ± 0.47                     |
| [C <sub>10</sub> mim][Br]  | 0.0848 ± 0.0006            | 97 ± 1.8                      |
| [C <sub>10</sub> TMA][Br]  | 0.197 ± 0.0073             | 95 ± 1.2                      |

## 2. Supporting Figures

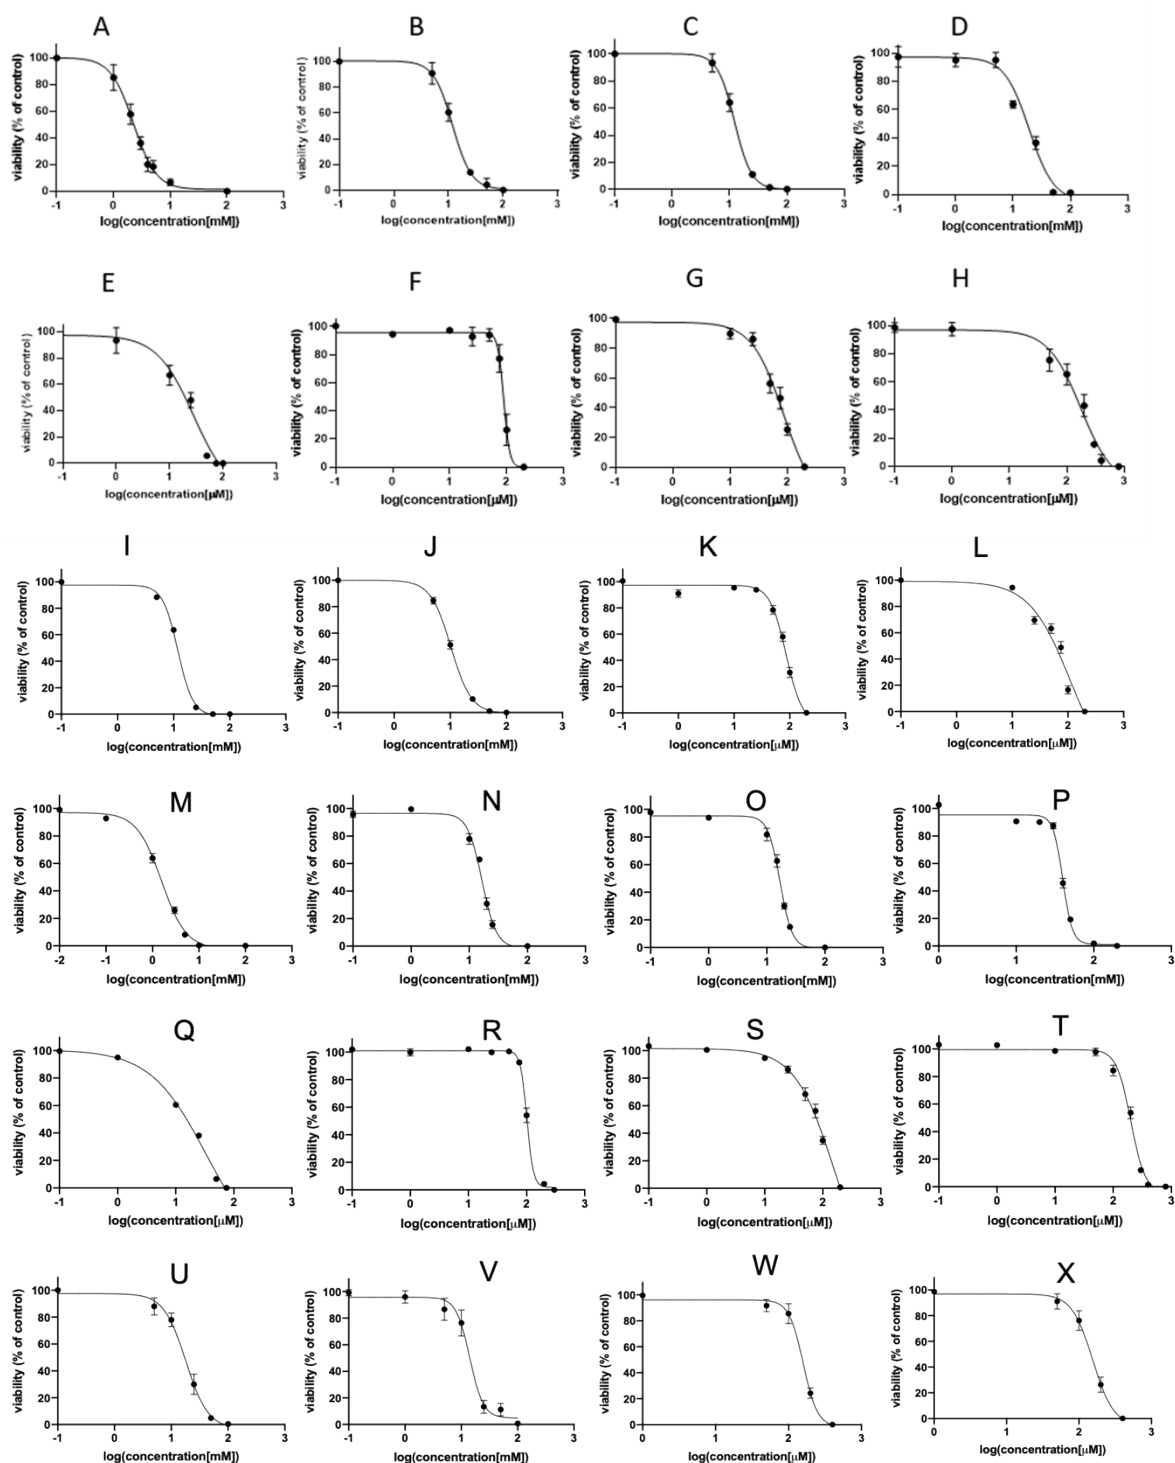

**Figure S1** Dose-response curves showing the effect of AmILs on the cell viability after 48 h treatment. In HeLa cells, A) [C<sub>4</sub>Quin][Br], B) [C<sub>4</sub>Py][Br], C) [C<sub>4</sub>Mim][Br], D) [C<sub>4</sub>TMA][Br], E) [C<sub>10</sub>Quin][Br], F) [C<sub>10</sub>Py][Br], G) [C<sub>10</sub>Mim][Br], H) [C<sub>10</sub>TMA][Br], I) [C<sub>4</sub>Mim][BF<sub>4</sub>], J)

[C<sub>4</sub>Mim][CF<sub>3</sub>SO<sub>3</sub>], K) [C<sub>10</sub>Mim][BF<sub>4</sub>], L) [C<sub>10</sub>Mim][CF<sub>3</sub>SO<sub>3</sub>]. In Beas-2b cells, M) [C<sub>4</sub>Quin][Br], N) [C<sub>4</sub>Py][Br], O) [C<sub>4</sub>Mim][Br], P) [C<sub>4</sub>TMA][Br], Q) [C<sub>10</sub>Quin][Br], R) [C<sub>10</sub>Py][Br], S) [C<sub>10</sub>Mim][Br], T) [C<sub>10</sub>TMA][Br], U) [C<sub>4</sub>Mim][BF<sub>4</sub>], V) [C<sub>4</sub>Mim][CF<sub>3</sub>SO<sub>3</sub>], W) [C<sub>10</sub>Mim][BF<sub>4</sub>], X) [C<sub>10</sub>Mim][CF<sub>3</sub>SO<sub>3</sub>]. Data represents the mean  $\pm$  SEM of 3 independent experiments.

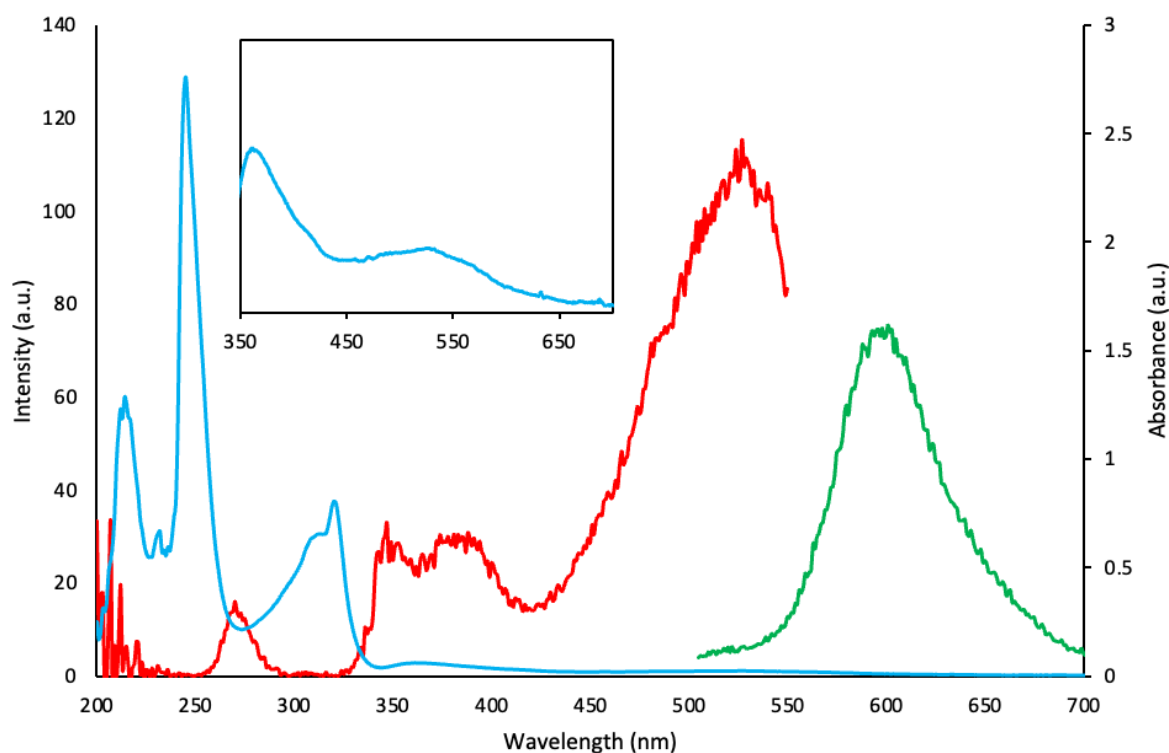

**Figure S2** Optical absorbance (blue), excitation (red) and emission from 488 nm (green) spectra for [C<sub>4</sub>MeQuin] [I] in acetonitrile. Inset shows absorbance between 350 – 700 nm for clarity.

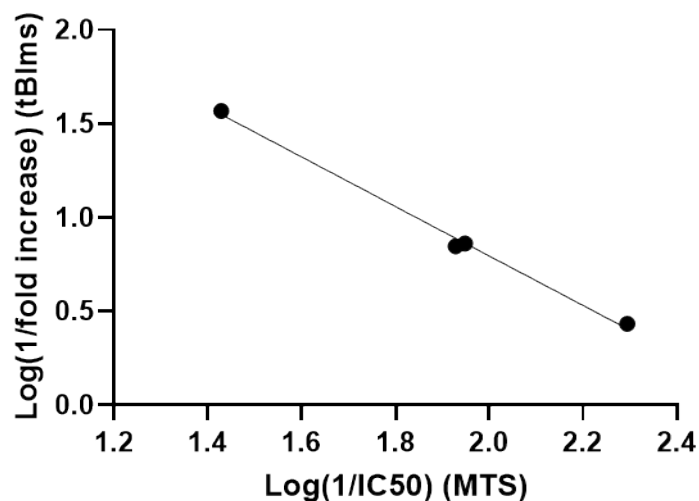

**Figure S3** Correlation plot of tBLMs conductance Log(1/fold increase) against MTS Log(1/IC<sub>50</sub>) for C<sub>10</sub>-AmILs.

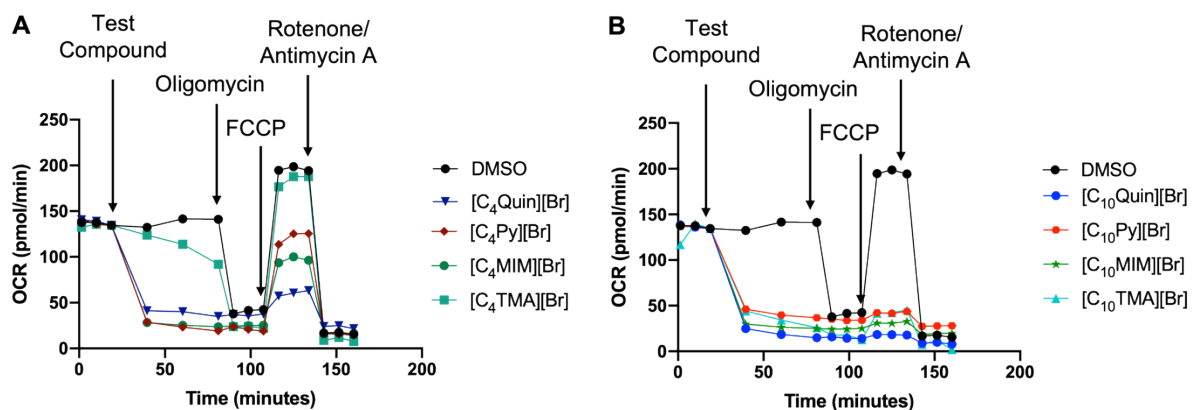

**Figure S4** (A) The effect of C<sub>4</sub>-ILs on oxygen consumption rate (OCR) in HeLa cells. (B) The effect of C<sub>10</sub>-ILs on oxygen consumption rate (OCR) in HeLa cells. The sequential addition of the ILs at IC<sub>50</sub> concentrations, oligomycin a mitochondrial ATP-synthase inhibitor (1  $\mu$ M), the protonophore FCCP (2  $\mu$ M) and the electron transport chain complex inhibitors rotenone/antimycin A (1  $\mu$ M). Data represents the average of 2 wells from the same experiment.

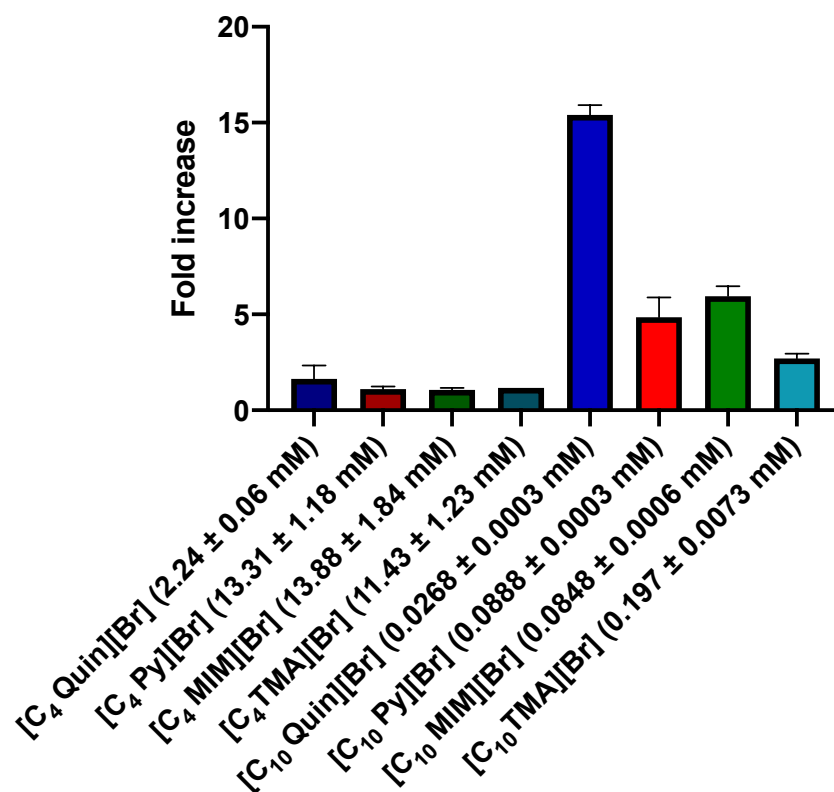

**Figure S5** Effects of AmILs (at MTS IC<sub>50</sub> concentrations) on the conductance of DOPC lipid bilayers tethered to gold electrodes, as measured by electrical impedance spectroscopy. Data normalised to membrane conductance prior to AmIL treatment at pH = 7. Data represents the mean 2 independent experiments.

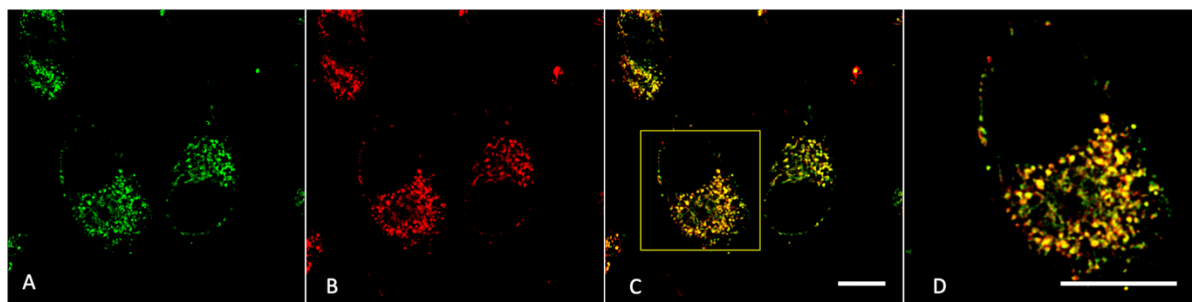

**Figure S6** Confocal fluorescence microscopy of  $[C_4MeQuin][I]$  in HeLa cells without the Hoechst stain. (A) Green channel  $[C_4MeQuin][I]$  (500nM,  $\lambda_{ex}=488$  nm). (B) Red channel Mitotracker Deep Red (200 nM,  $\lambda_{ex}=644$  nm). (C) Merged channels. (D) Magnified view of region in (C). Scale Bar (10  $\mu m$ ).



### **3. Experimental procedures - Chemistry**

#### **General Chemistry**

[C<sub>4</sub>Py][Br], [C<sub>4</sub>MIM][Br], [C<sub>4</sub>TMA][Br], [C<sub>10</sub>TMA][Br], all chemical reagents and solvents were purchased from Sigma Aldrich (Castle Hill, NSW, Australia) or Chem-Supply (Port Adelaide, SA, Australia). The purity of all test compounds was confirmed to be  $\geq 95\%$  by absolute quantitative <sup>1</sup>H nuclear magnetic resonance (qNMR) spectroscopy. <sup>1</sup>H and <sup>13</sup>C NMR spectra were acquired using an Agilent 500 MHz spectrometer (500.13 MHz for <sup>1</sup>H and 125.76 MHz for <sup>13</sup>C) in deuterated chloroform (CDCl<sub>3</sub>) unless otherwise specified. Melting point determination was performed using Stuart automatic melting point. High- resolution mass spectroscopy (HRMS) was performed on an Agilent 6510 Accurate-Mass Q-TOF Mass Spectrometer equipped with an ESI source.

#### **General Procedure for synthesis of Ionic liquids.**

The alkyl bromide (5 mmol) and appropriate heterocycle (5 mmol) were heated at 140 °C for 24 hours. The reaction mixture was cooled to room temperature and the resulting crude products were purified by one of the following methods:

Method 1 – Crude solids were triturated with hexane. The solids were then dissolved in a minimum volume of chloroform, and diethyl ether was added dropwise until precipitation. The resultant solid was then collected using vacuum filtration and used without further purification.

Method 2 – Crude oils were washed with hexane which was subsequently removed by decantation. The washed oil was then dissolved in a minimum volume of chloroform, and diethyl ether was added dropwise until the oil reformed. The ether layer was removed via decantation and the resultant oil was dried under reduced pressure.

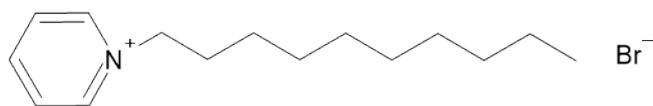

**1-Decylpyridinium bromide ([C<sub>10</sub>Py][Br])** was obtained as a yellow wax. Product formed by method 1. Yield = 90%. <sup>1</sup>H NMR (CDCl<sub>3</sub>): δ 9.47 (d, *J* = 6 Hz, 2H), 8.51 (t, *J* = 8 Hz, 1H), 8.13 (t, *J* = 6.5 Hz, 2H), 5.03 (t, *J* = 7.5 Hz, 2H), 2.03 (pent, *J* = 8 Hz, 2H), 1.22-1.42 (m, 14H), 0.88 (t, *J* = 7.5 Hz, 3H). <sup>13</sup>C NMR (CDCl<sub>3</sub>): δ 145.31, 144.99, 129.71, 128.56, 62.21, 31.90, 31.80, 29.44, 29.34, 29.21, 29.05, 26.07, 22.63, 14.09. HRMS (ESI) *m/z* [M]<sup>+</sup> calculated for C<sub>15</sub>H<sub>26</sub>N 220.2054; found 220.2061. Purity by Q-NMR = 96.3 %. The <sup>1</sup>H and <sup>13</sup>C NMR spectrum were in agreement with previously reported data.<sup>1</sup>

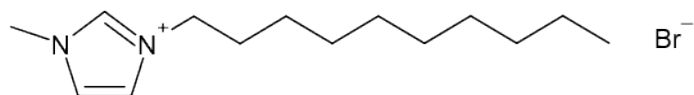

**1-Decyl-3-methylimidazolium bromide ([C<sub>10</sub>Mim][Br])** obtained as a colourless liquid. Product formed by method 1. Yield = 96 %. <sup>1</sup>H NMR (CDCl<sub>3</sub>): δ 10.46 (s, 1H), 7.45 (t, *J* = 1.5 Hz, 1H), 7.32 (t, *J* = 2 Hz, 1H), 4.30 (t, *J* = 7.5 Hz, 2H), 4.12 (s, 3H), 1.86-1.94 (m, 2H), 1.18-1.37 (m, 14H), 0.86 (t, *J* = 7.5 Hz, 3H). <sup>13</sup>C NMR (CDCl<sub>3</sub>): δ 137.36, 123.68, 121.51, 60.45, 36.75, 31.79, 30.29, 29.41, 29.33, 29.20, 28.96, 26.23, 22.61, 14.07. HRMS (ESI) *m/z* [M+H]<sup>+</sup> calculated for C<sub>14</sub>H<sub>27</sub>N 223.2163; found 223.2177. Purity by Q-NMR = 99.3 %. The <sup>1</sup>H NMR spectrum were in agreement with previously reported data.<sup>2</sup>

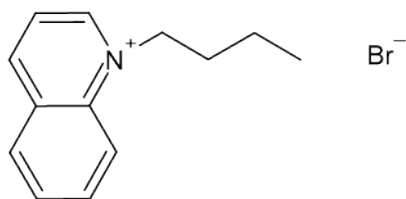

**1-Butylquinolinium bromide ([C<sub>4</sub>Quin][Br])** obtained as a brown solid. Product formed by method 2. Yield = 93 %. Mp = 159.3 °C. <sup>1</sup>H NMR (CDCl<sub>3</sub>): δ 10.63 (d, *J* = 5.5 Hz, 1H), 9.00 (d, *J* = 8 Hz, 1H), 8.30-8.35 (m, 2H), 8.21 (t, *J* = 7.5 Hz, 2H), 7.97 (t, *J* = 8 Hz, 1H), 5.42 (t, *J* = 7.5 Hz, 2H), 2.10 (pentet, *J* = 8 Hz 2H), 1.57 (sext, *J* = 8 Hz, 2H), 1.01 (t, *J* = 7.5 Hz, 3H). <sup>13</sup>C NMR (CDCl<sub>3</sub>): δ 150.48, 147.25, 137.67, 136.06, 131.18, 130.20, 129.71, 122.61, 118.40, 58.01, 32.26, 19.81, 13.63. HRMS (ESI) *m/z* [M]<sup>+</sup> calculated for C<sub>13</sub>H<sub>16</sub>BrN 186.1272; found 186.1280. Purity by Q-NMR = 95.1 %. The <sup>1</sup>H and <sup>13</sup>C NMR spectrum were in agreement with previously reported data.<sup>3</sup>

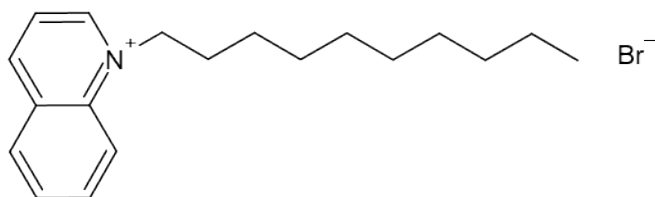

**1-Decylquinolinium bromide ([C<sub>10</sub>Quin][Br])** obtained as a brown solid. Product formed by method 2. Yield = 81 %. Mp = 53.4 °C. <sup>1</sup>H NMR (CDCl<sub>3</sub>): δ 8.93 (dd, *J* = 1.5, 4 Hz, 1H), 8.17 (d, *J* = 8.5 Hz, 1H), 8.12 (d, *J* = 8 Hz, 1H), 7.83 (d, *J* = 8 Hz, 1H), 7.73 (t, *J* = 8 Hz, 1H), 7.56 (t, *J* = 8 Hz, 1H), 7.41 (dd, *J* = 4.5, 8.5 Hz, 1H), 3.41 (t, *J* = 7 Hz, 2H), 1.85 (pent, *J* = 8 Hz, 2H), 1.20-1.34 (m, 14H), 0.88 (t, *J* = 7 Hz, 3H). <sup>13</sup>C NMR (CDCl<sub>3</sub>): δ 150.59, 147.16, 137.65, 135.94, 131.17, 130.15, 129.72, 122.72, 118.30, 58.25, 31.79, 30.41, 29.43, 29.33, 29.20, 29.15, 26.50, 22.62, 14.09. HRMS (ESI) *m/z* [M]<sup>+</sup> calculated for C<sub>19</sub>H<sub>28</sub>N 270.2211; found 270.2217. Purity by Q-NMR = 97.9 %. The <sup>1</sup>H NMR spectrum were in agreement with previously reported data.<sup>4</sup>

### Procedure for the synthesis of [C<sub>4</sub>MeQuin][I]

Quinaldine (1 mmol) was heated with 1-iodobutane (5 mmol) at 140 °C for 24 hours in a sealed pressure tube. The crude mixture was cooled to room temperature and the resulting solid was triturated with hexane and then diethyl ether to afford pure product.

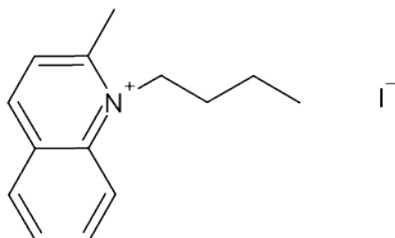

**1-butyl-2-methylquinolinium iodide ([C<sub>4</sub>MeQuin][I])** obtained as a black solid. Product formed by method 2. Yield = 48 %. Mp = 156.9 °C. <sup>1</sup>H NMR (DMSO): δ 9.10 (d, *J* = 11 Hz, 1H), 8.58 (d, *J* = 10 Hz, 1H), 8.25-8.21 (m, 1H), 8.12 (d, *J* = 11 Hz, 1H), 7.99 (t, *J* = 9 Hz, 1H), 4.92 (t, *J* = 10 Hz, 2H), 3.12 (s, 3H), 1.89 (pentet, *J* = 10 Hz 2H), 1.59 (sext, *J* = 9 Hz, 2H), 0.99 (t, 9 Hz, 3H). <sup>13</sup>C NMR (CDCl<sub>3</sub>): δ 161.06, 146.14, 138.75, 135.77, 131.09, 129.52, 128.73, 126.05, 119.42, 51.72, 30.47, 22.96, 19.77, 14.00. HRMS (ESI) *m/z* [M]<sup>+</sup> calculated for C<sub>14</sub>H<sub>18</sub>N 200.1428; found 200.1432. Purity by Q-NMR = 98.2 %.

### Procedure for anion exchange

[C<sub>10</sub>Mim][BF<sub>4</sub>] and [C<sub>10</sub>Mim][CH<sub>3</sub>SO<sub>3</sub><sup>-</sup>] were prepared by a metathesis reaction between [C<sub>10</sub>Mim][Br] and saturated solutions of sodium tetrafluoroborate (NaBF<sub>4</sub>) and sodium trifluoromethanesulfonate (CF<sub>3</sub>NaO<sub>3</sub>S) respectively. The precipitate was collected with vacuum filtrations and washed then dried under vacuum.

## 4. Experimental procedures - Biology

### General cell culture and cell-based assays

HeLa cervical cancer cells and BEAS-2B lung epithelial cells were provided by **Professor Michael Murray** (University of Sydney) and Distinguished Professor Brian Oliver (University of Technology Sydney), and were originally obtained from the American Type Culture Collection (Manassas, VA). Cells were grown at 37 °C in a humidified atmosphere of 5% CO<sub>2</sub> in air in DMEM supplemented with 10% fetal bovine serum (Invitrogen, Life Technologies, Victoria, Australia). Confluent cells (80 – 90%) were harvested using Trypsin/EDTA after washing with PBS. Cells were treated with various concentrations of the test compounds in media (for C<sub>4</sub>AmILs) or in media with 0.1% DMSO (for C<sub>10</sub>AmILs); matched control cells were treated media only or media with 0.1% DMSO.

**MTS cell viability assay:** The ability of ILs to decrease the cell viability in HeLa cervical cancer cells was assessed using the 3-(4,5-dimethylthiazol-2-yl)-5-(3-carboxymethoxyphenyl)-2-(4-sulfophenyl)-2H-tetrazolium (MTS) *in vitro* cytotoxicity assay. Cells (HeLa and Beas-2b) were seeded in 96-well plates (5 x 10<sup>3</sup> cells per well) and allowed to adhere overnight. The cells were then treated with various concentrations of ILs for 48 h. Control cells were treated with DMEM supplemented with 10% FBS and 0.1% DMSO. The cell viability was determined using the CellTiter 96® AQueous One Solution Cell Proliferation Assay (Promega, USA) according to the manufacturer's recommendation. The IC<sub>50</sub> dose response curves were defined as the test compound concentrations which prevented cell growth of more than 50% (relative to the vehicle control) and were constructed using non- linear regression analysis with Prism 8.4.2 (GraphPad Software, CA, USA).

**Mitochondrial function:** Mitochondrial function was measured by determining the OCR of cells with a Seahorse XF24 extracellular flux analyser (Seahorse Bioscience, MA, USA) according to the manufacturer's protocol. HeLa cells were seeded in a 24-well XF cell culture

microplates ( $2.5 \times 10^4$  cells per well) and allowed to adhere overnight (37 °C, 5% CO<sub>2</sub>). After 24 h, the culture media was replaced with buffered XF Base Medium supplemented with 2 mM L-glutamine, 10 mM glucose and 2 mM sodium pyruvate at pH=7.4. The cells were incubated at 37 °C without CO<sub>2</sub> for an hour, and then, the OCR was measured utilizing an XF Cell Mito Stress Test Kit (Seahorse Bioscience, MA, USA). Test compounds (final concentration at MTS IC<sub>50</sub>), oligomycin (final concentration 1 µM), carbonylcyanide m-chlorophenylhydrazone (FCCP-final concentration 2 µM) and rotenone/antimycin A (final concentration 0.5 µM) were added to the sensor cartridge, and the OCR was measured using a modified cycling program.

**Fluorescence microscopy:** HeLa cells were seeded on a 24-well glass bottom plate ( $1 \times 10^4$  cells/well) and allowed to adhere overnight. Cells were treated with [C<sub>4</sub>MeQuin][I] (500 nM) and stained with Hoechst (5 µM) and mitotracker deep red (100 nm) and then incubated (37 °C, 20 min). The cells were washed twice with media, and then incubated with 4% paraformaldehyde/PBS to fix the cells (37 °C, 20 min). The cells were washed twice with PBS prior to examination of the cells on a Nikon A1 laser scanning confocal microscope with a 60X Plan Apo (NA 1.4) objective. Hoechst 33342 stained nuclei were detected using a 405 nm laser and a 400-450 nm bandpass filter. [C<sub>4</sub>MeQuin][I] labelled structures were detected with a 458 nm laser and a 500-550 nm bandpass filter. Mitotracker Deep Red labelled Mitochondria were detected with a 640 nm laser and a 662-737 nm bandpass filter.

**JC-1 assay:** HeLa cells were seeded in triplicate in black 96-well plates ( $1 \times 10^4$  cells/well) and allowed to adhere overnight. The cells were treated with test compounds at their individual cell viability IC<sub>50</sub> concentrations for 1 h, control cells received DMEM with 10% FBS and 0.1% DMSO. Cells were incubated with the JC-1 dye in media with 10% FBS (37°C, 20 min) and the JC-1 red: green ratio was measured on the teacan plate reader. (JC-1 Mitochondrial Membrane Potential Assay Kit; Cayman Chemical, Ann Arbor, MI).

**ATP assay:** ATP formation was assessed in HeLa cells which were seeded in triplicate in black

96-well plates ( $1 \times 10^4$  cells/well) and allowed to adhere overnight. Cells were treated with ILs at their respective cell viability  $IC_{50}$  concentration at various time points (0-4 hr) in DMSO (final concentration of 0.1 %), control cells were treated with 0.1% DMSO alone. CellTiter-Glo solution was added to cells (RT, 30 min) and the luminescence was determined (CellTiter-Glo® luminescent cell viability assay, Promega; Annandale, NSW, Australia).

**ROS assay:** HeLa cells were seeded in triplicate in a 96-well black plate ( $2 \times 10^4$  cells/well) and allowed to adhere overnight. The following day cells were washed with 200  $\mu$ L prewarmed PBS, then cells were incubated with 100  $\mu$ L of DCFDA solution for 20 mins at 37 °C. Next, cells were treated with ILs at their individual cell viability  $IC_{50}$  values for 6 h and  $H_2O_2$  (200  $\mu$ M, positive control) and ROS was measured on the teacan plate reader.

**Statistical analysis:** For in vitro assays, the data obtained was analysed using one-way analysis of variance (ANOVA) followed by Tukey's post hoc analysis.  $P < 0.05$  were accepted as being statistically significant. All statistical analyses were performed using GraphPad Prism version 8.4.2 (GraphPad Software, CA, USA). The results are expressed as the means  $\pm$  SEM unless otherwise specified.

## 5. Experimental procedures – Tethered bilayer lipid membranes

**Tethered bilayer lipid membranes:** Lipid bilayers were anchored across a gold electrode according to “T10” architecture.<sup>5,6</sup> This consists of 10% benzyl-disulfide (tetra-ethyleneglycol) n=2 C20-phytanyl “tethering” molecules interspersed with 90% benzyl-disulfide-tetra-ethyleneglycol-OH “spacer” molecules. Spacer and tether molecules are all coordinated onto a 2.1 mm<sup>2</sup> gold tethering electrode. To these first layer chemistries were added a second layer of mobile phase lipid molecules of 3 mM 1,2-dioleoyl-sn-glycero-3-phosphocholine (DOPC) (Avanti Polar Lipids Inc., Alabaster, USA) which was left to incubate with the tethering molecules for exactly 2 min before a rapid exchange of 3 x 400  $\mu$ L 100 mM NaCl tris buffer induced the formation of a completed tBLM.

**Electrical impedance spectroscopy:** Swept frequency electrical impedance spectroscopy ranging from 0.1 Hz to 2000 Hz was applied at 25 mV peak-to-peak, using a Tethapod<sup>TM</sup> electrical impedance spectrometer (SDx Tethered Membranes Pty Ltd). Impedance and phase profiles were fitted to an equivalent circuit consisting of a constant phase element, representing the tethering gold electrode and reservoir region, in series with a resistor, to represent the impedance of the surrounding electrolyte solution, and a resistor/capacitor representing the lipid bilayer. Data fitting utilized a proprietary adaptation of a Levenberg–Marquardt fitting routine incorporated into the TethaQuick<sup>TM</sup> software (SDx Tethered Membranes Pty Ltd).



## 6. References

1. A. Cornellas, L. Perez, F. Comelles, I. Ribosa, A. Manresa and M. T. Garcia, *J. Colloid Interface Sci.*, 2011, **355**, 164-171.
2. S. L. Desset, S. W. Reader and D. J. Cole-Hamilton, *Green Chem.*, 2009, **11**, 630-637.
3. K. Lava, Y. Evrard, K. V. Hecke, L. V. Meervelt and K. Binnemans, *RSC Adv.*, 2012, **2**, 8061-8070.
4. J. Marek, V. Buchta, O. Soukup, P. Stodulka, J. Cabal, K. K. Ghosh, K. Musilek and K. Kuca, *Molecules.*, 2012, **17**, 6386-6394.
5. C. Cranfield, S. Carne, B. Martinac and B. Cornell, *Methods Mol. Biol.*, 2015, **1232**, 45-53.
6. C. G. Cranfield, T. Bettler and B. Cornell, *Langmuir.*, 2015, **31**, 292-298.
